# Supplementary material
Source: PubMed Central journal article supplement (PMC5699947)
Supplement: NIHMS910505-supplement-Graphic_Abstract.pdf [file NIHMS910505-supplement-Graphic_Abstract.pdf]

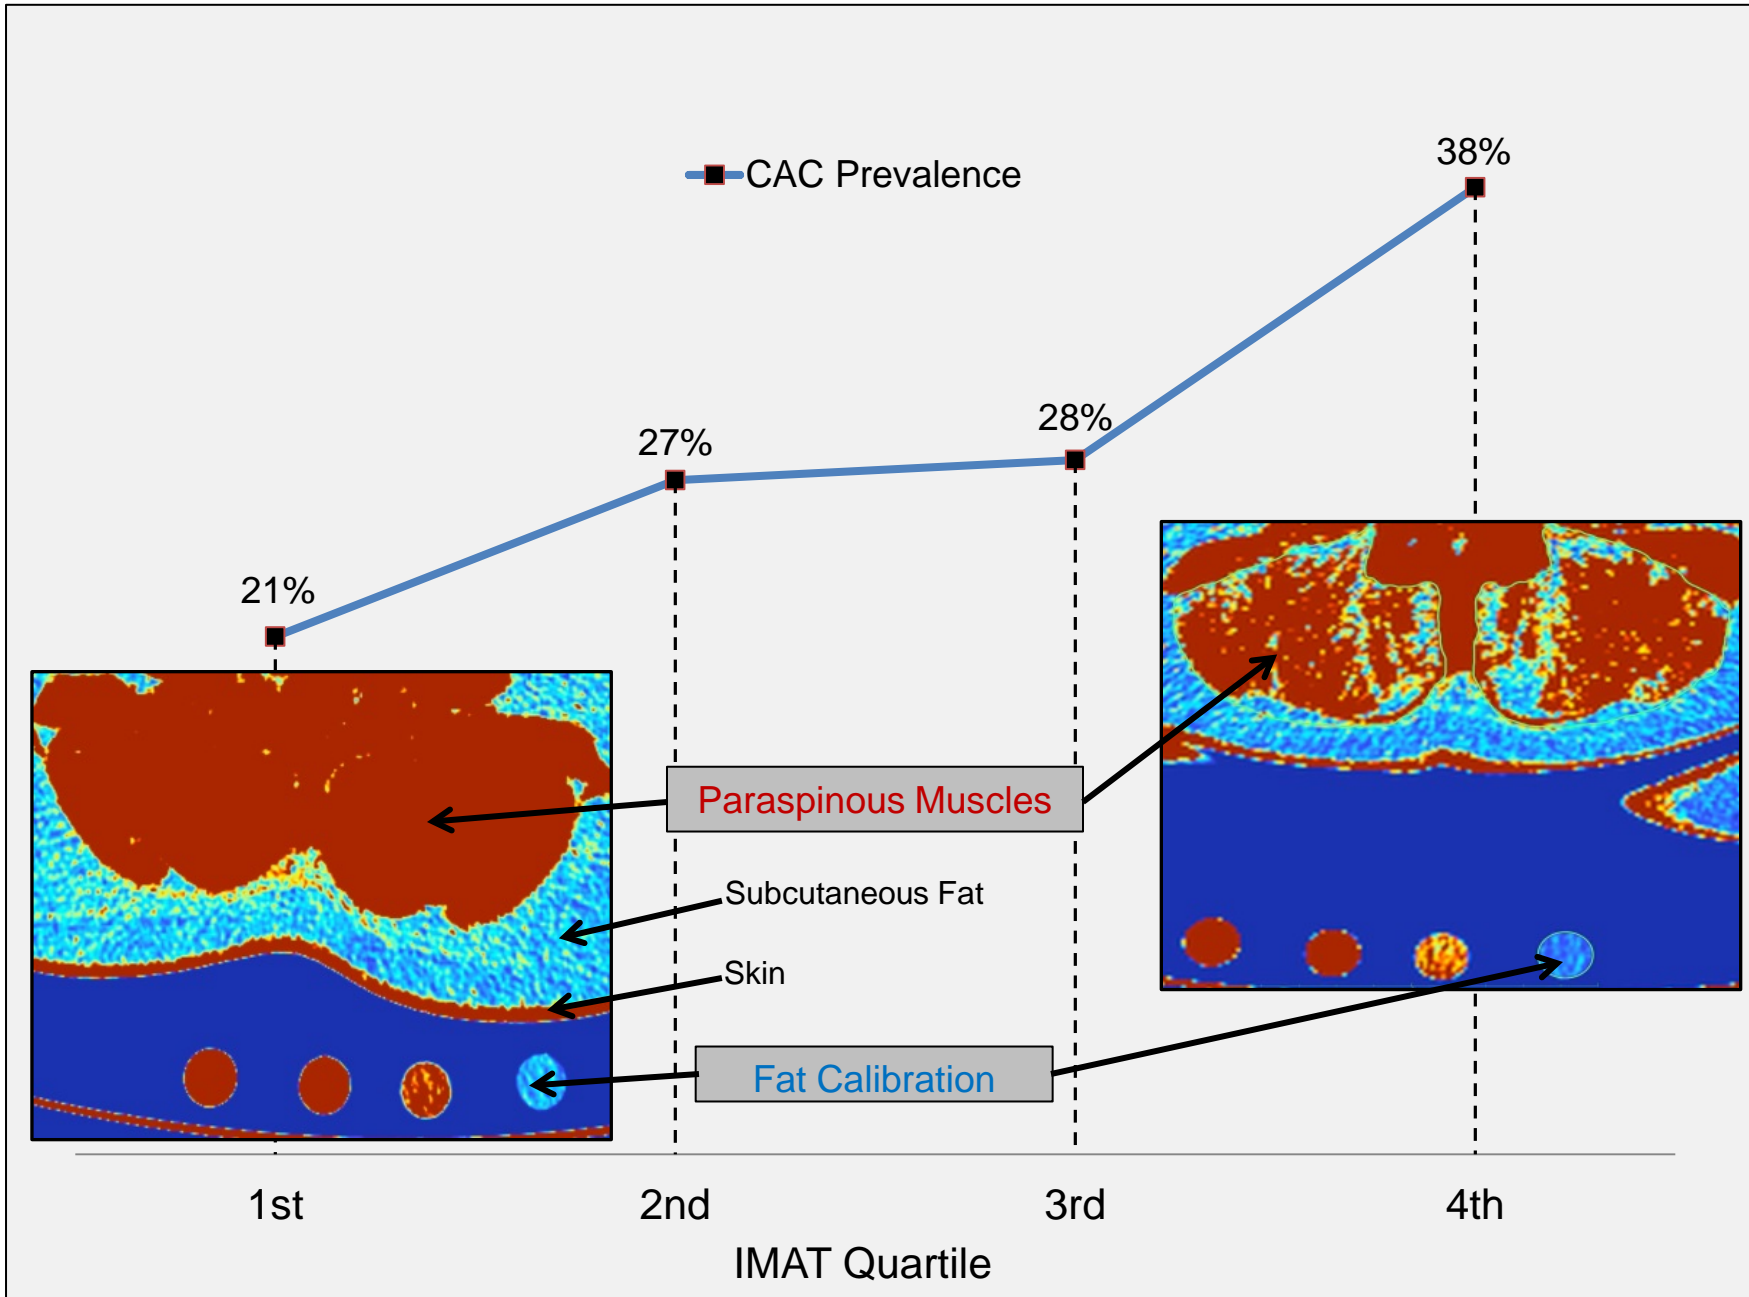

■ CAC Prevalence

38%

28%

27%

21%

Paraspinous Muscles

Subcutaneous Fat

Skin

Fat Calibration

1st

2nd

3rd

4th

IMAT Quartile
