# Supplementary material
Source: PubMed Central journal article supplement (PMC5699947)
Supplement: NIHMS910505-supplement-Supplemental_Tables_I-V_pdf.pdf [file NIHMS910505-supplement-Supplemental_Tables_I-V_pdf.pdf]

Supplemental Table I. Abdominal muscle composition \*

| Muscle Group    | IMAT volume, cm <sup>3</sup> |             | Total volume, cm <sup>3</sup> |              | Normalized IMAT |             |
|-----------------|------------------------------|-------------|-------------------------------|--------------|-----------------|-------------|
|                 | Mean(SD)                     | Range       | Mean(SD)                      | Range        | Mean(SD)        | Range       |
| Rectus          | 1.42(1.06)                   | 0.02, 9.39  | 7.48(2.43)                    | 2.12, 20.54  | 0.19(0.13)      | 0.003, 0.80 |
| Lateral Oblique | 3.59(3.12)                   | 0.07, 32.15 | 29.04(8.99)                   | 11.86, 73.84 | 0.12(0.07)      | 0.003, 0.57 |
| Psoas           | 0.71(0.58)                   | 0.01, 6.00  | 12.27(4.16)                   | 3.21, 28.49  | 0.06(0.04)      | 0.001, 0.36 |
| Paraspinous     | 3.69(2.55)                   | 0.24, 23.30 | 33.00(7.26)                   | 12.72, 69.90 | 0.11(0.07)      | 0.01, 0.64  |
| Overall         | 2.35(1.63)                   | 0.21, 15.89 | 20.45(5.17)                   | 9.98, 41.45  | 0.11(0.06)      | 0.01, 0.51  |

\*mean of right and left sides for individual muscle groups and overall mean of all muscle measures from a 10 mm in z-axis length sample center at L3-L4 disk; Normalized IMAT is ratio of IMAT volume to total muscle volume

Supplemental Table II. Correlations between abdominal muscle composition and anthropometric and CT adipose tissue measures

| Muscle Group    | Measure*    | Height | BMI  | WC   | SAT   | VAT  | PAT  | IMAT Volume |                 |       |             |         |
|-----------------|-------------|--------|------|------|-------|------|------|-------------|-----------------|-------|-------------|---------|
|                 |             |        |      |      |       |      |      | Rectus      | Lateral Oblique | Psoas | Paraspinous | Overall |
| Rectus          | IMAT        | 0.03   | 0.58 | 0.59 | 0.51  | 0.46 | 0.40 | 1.00        | 0.65            | 0.56  | 0.59        | 0.76    |
|                 | Total       | 0.44   | 0.42 | 0.59 | 0.19  | 0.47 | 0.39 | 0.40        | 0.46            | 0.48  | 0.32        | 0.46    |
|                 | Normal IMAT | -0.16  | 0.43 | 0.37 | 0.46  | 0.29 | 0.25 | 0.86        | 0.44            | 0.34  | 0.46        | 0.56    |
| Lateral Oblique | IMAT        | 0.11   | 0.66 | 0.71 | 0.54  | 0.58 | 0.52 | 0.65        | 1.00            | 0.71  | 0.73        | 0.93    |
|                 | Total       | 0.55   | 0.44 | 0.66 | 0.17  | 0.55 | 0.47 | 0.41        | 0.58            | 0.49  | 0.32        | 0.52    |
|                 | Normal IMAT | -0.10  | 0.64 | 0.62 | 0.62  | 0.50 | 0.43 | 0.62        | 0.91            | 0.63  | 0.75        | 0.88    |
| Psoas           | IMAT        | 0.20   | 0.56 | 0.66 | 0.43  | 0.61 | 0.53 | 0.56        | 0.71            | 1.00  | 0.77        | 0.82    |
|                 | Total       | 0.60   | 0.21 | 0.43 | -0.02 | 0.32 | 0.30 | 0.17        | 0.22            | 0.40  | 0.11        | 0.21    |
|                 | Normal IMAT | -0.06  | 0.55 | 0.56 | 0.52  | 0.55 | 0.45 | 0.55        | 0.68            | 0.86  | 0.80        | 0.80    |
| Paraspinous     | IMAT        | 0.01   | 0.59 | 0.59 | 0.52  | 0.51 | 0.43 | 0.59        | 0.73            | 0.77  | 1.00        | 0.91    |
|                 | Total       | 0.59   | 0.38 | 0.58 | 0.13  | 0.47 | 0.41 | 0.34        | 0.37            | 0.41  | 0.32        | 0.40    |
|                 | Normal IMAT | -0.19  | 0.50 | 0.44 | 0.52  | 0.38 | 0.32 | 0.50        | 0.62            | 0.64  | 0.92        | 0.80    |
| Overall         | IMAT        | 0.08   | 0.69 | 0.73 | 0.58  | 0.61 | 0.53 | 0.76        | 0.93            | 0.82  | 0.91        | 1.00    |
|                 | Total       | 0.62   | 0.41 | 0.64 | 0.14  | 0.52 | 0.45 | 0.38        | 0.48            | 0.50  | 0.31        | 0.46    |
|                 | Normal IMAT | -0.17  | 0.63 | 0.57 | 0.63  | 0.48 | 0.40 | 0.69        | 0.81            | 0.68  | 0.88        | 0.91    |

\*mean IMAT volume (cm<sup>3</sup>), total muscle volume (cm<sup>3</sup>), and normalized IMAT (ratio of IMAT volume/total muscle volume) of right and left sides and overall for all muscle groups; Correlations statistically significant at p<.001 except for rectus IMAT and height, paraspinous IMAT and height, and psoas total and SAT (all p>0.05). "Normal IMAT": normalized IMAT = IMAT to total muscle ratio

Supplemental Table III. Logistic regression models for association of overall IMAT volume and normalized overall IMAT with CAC prevalence in 2,661 non-diabetics [Odds Ratio(95% Confidence Interval)]

| Measure            | Quartile      | CAC<br>(cases/total) | Model 1                 | Model 2                 | BMI                     | Model 2 plus<br>VAT     | PAT                    |
|--------------------|---------------|----------------------|-------------------------|-------------------------|-------------------------|-------------------------|------------------------|
| IMAT<br>Volume     | <1.23         | 132 / 666            | reference               | reference               | reference               | reference               | reference              |
|                    | 1.23- <1.82   | 157 / 663            | 1.11 (0.84,1.46)        | 1.03 (0.77,1.37)        | 1.03(0.77,1.39)         | 1.07(0.80,1.43)         | 1.02(0.76,1.36)        |
|                    | 1.82 - <2.77  | 189 / 667            | <b>1.37 (1.04,1.80)</b> | 1.24 (0.93,1.66)        | 1.25(0.92,1.69)         | 1.35(0.99,1.84)         | 1.22(0.91,1.65)        |
|                    | ≥2.77         | 230 / 665            | <b>1.87 (1.43,2.46)</b> | <b>1.57 (1.16,2.13)</b> | <b>1.60(1.13,2.29)</b>  | <b>1.80(1.27,2.56)</b>  | <b>1.50(1.07,2.09)</b> |
|                    |               | P <sub>trend</sub>   | <0.0001                 | 0.005                   | 0.004                   | 0.001                   | 0.011                  |
|                    | Continuous    |                      | 1.29 (1.17,1.43)*       | 1.20 (1.07,1.35)        | 1.24 (1.07,1.45)        | 1.26 (1.10,1.43)        | 1.18(1.04,1.33)        |
| Normalized<br>IMAT | <0.066        | 176 / 666            | Reference               | reference               | Reference               | reference               | reference              |
|                    | 0.066- <0.095 | 157 / 668            | 0.99 (0.76,1.30)        | 0.90(0.68,1.19)         | 0.90 (0.68,1.19)        | 0.93 (0.70,1.24)        | 0.89(0.67,1.18)        |
|                    | 0.095- <0.138 | 179 / 662            | 1.26 (0.96,1.66)        | 1.11(0.84,1.49)         | 1.11 (0.83,1.50)        | 1.18 (0.87,1.61)        | 1.08(0.80,1.45)        |
|                    | ≥0.138        | 196 / 665            | <b>1.84 (1.38,2.43)</b> | <b>1.54(1.13,2.09)</b>  | <b>1.54 (1.09,2.18)</b> | <b>1.67 (1.18,2.37)</b> | <b>1.45(1.04,2.03)</b> |
|                    |               | P <sub>trend</sub>   | <0.0001                 | 0.003                   | 0.010                   | 0.001                   | 0.018                  |
|                    | Continuous    |                      | 1.30 (1.18,1.44)        | 1.19 (1.06,1.34)        | 1.20 (1.05,1.39)        | 1.24 (1.09,1.41)        | 1.16(1.03,1.32)        |

Prevalence based 0 or >0 Agatston Units; normalized IMAT = IMAT volume/total muscle volume ratio

Model 1: age, sex, race, sex\*race, center, height (except when BMI is included), and education; Model 2: model 1 + physical activity, alcohol consumed, smoking history, systolic BP, BP med use, HDL cholesterol, triglycerides, cholesterol med use, CRP, and HOMA-IR.

\*estimate per SD IMAT volume (1.46 cm<sup>3</sup>) or normalized IMAT (0.06 cm<sup>3</sup>); **Bold** indicates odds ratio differs significantly (p<.05) from quartile 1 (reference). P<sub>trend</sub> is based on modeling continuous IMAT.

Supplemental Table IV. Logistic regression models for association of IMAT volume by muscle group with CAC prevalence [Odds Ratio(95% Confidence Interval)]

| Muscle Group    | Quartile | CAC (cases/total)  | Model 1                | Model 2                | BMI                    | Model 2 plus VAT       | PAT                    |
|-----------------|----------|--------------------|------------------------|------------------------|------------------------|------------------------|------------------------|
| Rectus          | 1        | 170 / 762          | reference              | reference              | reference              | reference              | reference              |
|                 | 2        | 193 / 765          | 1.02(0.80,1.32)        | 0.96(0.74,1.25)        | 0.95(0.73,1.23)        | 0.96(0.74,1.26)        | 0.94(0.72,1.23)        |
|                 | 3        | 226 / 761          | 1.22(0.95,1.56)        | 1.05(0.81,1.37)        | 1.02(0.78,1.34)        | 1.06(0.81,1.39)        | 1.02(0.78,1.33)        |
|                 | 4        | 273 / 762          | <b>1.67(1.30,2.13)</b> | <b>1.35(1.04,1.76)</b> | 1.28(0.95,1.71)        | <b>1.36(1.02,1.82)</b> | 1.28(0.97,1.70)        |
|                 |          | P <sub>trend</sub> | <0.0001                | 0.036                  | 0.146                  | 0.049                  | 0.643                  |
| Lateral Oblique | 1        | 148 / 763          | reference              | reference              | reference              | reference              | reference              |
|                 | 2        | 213 / 762          | 1.29(0.99,1.66)        | 1.17(0.90,1.52)        | 1.15(0.88,1.50)        | 1.18(0.90,1.53)        | 1.16(0.88,1.51)        |
|                 | 3        | 219 / 764          | 1.21(0.93,1.56)        | 1.01(0.77,1.32)        | 0.97(0.73,1.29)        | 1.02(0.77,1.37)        | 0.97(0.73,1.29)        |
|                 | 4        | 282 / 762          | <b>1.88(1.46,2.42)</b> | <b>1.41(1.07,1.89)</b> | 1.31(0.94,1.82)        | <b>1.46(1.05,2.02)</b> | 1.31(0.96,1.80)        |
|                 |          | P <sub>trend</sub> | <0.0001                | 0.026                  | 0.115                  | 0.035                  | 0.250                  |
| Psoas           | 1        | 152 / 762          | reference              | reference              | reference              | reference              | reference              |
|                 | 2        | 191 / 765          | 1.12(0.87,1.45)        | 1.03(0.79,1.35)        | 1.02(0.78,1.33)        | 1.05(0.80,1.38)        | 1.03(0.79,1.35)        |
|                 | 3        | 223 / 762          | 1.24(0.97,1.60)        | 1.08(0.82,1.41)        | 1.04(0.79,1.38)        | 1.11(0.84,1.46)        | 1.05(0.79,1.39)        |
|                 | 4        | 296 / 761          | <b>1.80(1.40,2.31)</b> | <b>1.37(1.04,1.81)</b> | 1.29(0.94,1.76)        | <b>1.44(1.05,1.99)</b> | 1.28(0.93,1.76)        |
|                 |          | P <sub>trend</sub> | <0.0001                | 0.071                  | 0.296                  | 0.084                  | 0.441                  |
| Paraspinous     | 1        | 178 / 762          | reference              | reference              | reference              | reference              | reference              |
|                 | 2        | 204 / 763          | 1.28(0.99,1.64)        | 1.14(0.88,1.48)        | 1.14(0.88,1.47)        | 1.16(0.89,1.51)        | 1.14(0.87,1.48)        |
|                 | 3        | 205 / 764          | <b>1.29(1.00,1.66)</b> | 1.13(0.86,1.47)        | 1.12(0.85,1.47)        | 1.17(0.89,1.54)        | 1.10(0.85,1.46)        |
|                 | 4        | 275 / 762          | <b>2.08(1.62,2.67)</b> | <b>1.65(1.26,2.15)</b> | <b>1.63(1.21,2.20)</b> | <b>1.75(1.30,2.35)</b> | <b>1.58(1.15,2.15)</b> |
|                 |          | P <sub>trend</sub> | <0.0001                | 0.001                  | 0.007                  | 0.001                  | 0.003                  |

Prevalence based 0 or >0 Agatston Units

Model 1: age, sex, race, sex\*race, center, height (except when BMI is included), and education; Model 2: model 1 + physical activity, smoking history, diabetes, systolic BP, BP med use, total cholesterol, HDL cholesterol, triglycerides, cholesterol med use, and CRP. **Bold** indicates odds ratio differs significantly from quartile 1 (reference). P<sub>trend</sub> is based on modeling continuous IMAT.

Supplemental Table V. Logistic regression models for association of normalized IMAT by muscle group with CAC prevalence [Odds Ratio(95% Confidence Interval)]

| Muscle Group    | Quartile | CAC (cases/total)  | Model 1                | Model 2                | BMI                    | Model 2 plus VAT       | PAT                    |
|-----------------|----------|--------------------|------------------------|------------------------|------------------------|------------------------|------------------------|
| Rectus          | 1        | 211 / 762          | reference              | reference              | reference              | reference              | reference              |
|                 | 2        | 193 / 762          | 0.84(0.66,1.08)        | 0.79(0.61,1.02)        | 0.77(0.60,1.00)        | 0.78(0.61,1.01)        | 0.77(0.60,1.00)        |
|                 | 3        | 223 / 763          | 1.13(0.89,1.44)        | 1.00(0.78,1.29)        | 0.97(0.75,1.25)        | 0.99(0.76,1.29)        | 0.96(0.74,1.24)        |
|                 | 4        | 235 / 763          | <b>1.37(1.07,1.75)</b> | 1.17(0.90,1.51)        | 1.09(0.83,1.44)        | 1.15(0.87,1.51)        | 1.11(0.84,1.44)        |
|                 |          | P <sub>trend</sub> | 0.002                  | 0.027                  | 0.057                  | 0.034                  | 0.486                  |
| Lateral Oblique | 1        | 189 / 762          | reference              | reference              | reference              | reference              | reference              |
|                 | 2        | 211 / 762          | 1.17(0.92,1.50)        | 1.03(0.80,1.34)        | 1.03(0.79,1.33)        | 1.05(0.81,1.36)        | 1.02(0.79,1.32)        |
|                 | 3        | 220 / 764          | 1.28(0.99,1.64)        | 1.11(0.86,1.45)        | 1.09(0.83,1.43)        | 1.14(0.86,1.51)        | 1.08(0.82,1.42)        |
|                 | 4        | 242 / 763          | <b>1.82(1.41,2.33)</b> | <b>1.42(1.08,1.86)</b> | 1.35(0.99, 1.84)       | <b>1.47(1.08,2.01)</b> | 1.33(0.98,1.81)        |
|                 |          | P <sub>trend</sub> | <0.0001                | 0.047                  | 0.214                  | 0.058                  | 0.058                  |
| Psoas           | 1        | 176 / 761          | reference              | reference              | reference              | reference              | reference              |
|                 | 2        | 222 / 765          | <b>1.36(1.06,1.74)</b> | 1.17(0.90,1.52)        | 1.15(0.89,1.50)        | 1.19(0.91,1.55)        | 1.14(0.88,1.49)        |
|                 | 3        | 208 / 762          | 1.24(0.96,1.59)        | 1.05(0.79,1.37)        | 1.02(0.77,1.34)        | 1.07(0.81,1.43)        | 1.02(0.76,1.35)        |
|                 | 4        | 256 / 763          | <b>1.92(1.49,2.48)</b> | <b>1.46(1.11,1.93)</b> | <b>1.38(1.01,1.87)</b> | <b>1.53(1.11,2.12)</b> | 1.35(0.97,1.88)        |
|                 |          | P <sub>trend</sub> | <0.0001                | 0.023                  | 0.093                  | 0.028                  | 0.167                  |
| Paraspinous     | 1        | 216 / 763          | reference              | reference              | reference              | reference              | reference              |
|                 | 2        | 198 / 763          | 1.14(0.89,1.46)        | 0.99(0.77,1.28)        | 0.98(0.76,1.28)        | 1.00(0.77,1.30)        | 0.98(0.75,1.28)        |
|                 | 3        | 205 / 762          | <b>1.33(1.03,1.72)</b> | 1.22(0.94,1.59)        | 1.20(0.92,1.57)        | 1.25(0.95,1.65)        | 1.18(0.89,1.57)        |
|                 | 4        | 243 / 763          | <b>1.90(1.46,2.47)</b> | <b>1.51(1.14,1.99)</b> | <b>1.45(1.07,1.97)</b> | <b>1.57(1.16,2.12)</b> | <b>1.42(1.02,1.97)</b> |
|                 |          | P <sub>trend</sub> | <0.0001                | 0.007                  | 0.037                  | 0.009                  | 0.003                  |

Prevalence based 0 or >0 Agatston Units; normalized IMAT = IMAT volume/total muscle volume ratio

Model 1: age, sex, race, sex\*race, center, height (except when BMI is included), and education; Model 2: model 1 + physical activity, smoking history, diabetes, systolic BP, BP med use, total cholesterol, HDL cholesterol, triglycerides, cholesterol med use, and CRP. **Bold** indicates odds ratio differs significantly from quartile 1 (reference). P<sub>trend</sub> is based on modeling continuous IMAT.
